# Supplementary material for: Assessment of functional fitness impacted by hospital rehabilitation in post-stroke patients who additionally contracted COVID-19
Source: PeerJ. 2024 Jan 5;12:e16710. doi: 10.7717/peerj.16710 (PMC10773450; doi:10.7717/peerj.16710)
Supplement: Supplemental Information 1 [file peerj-12-16710-s001.xlsx]

## Sheet: Arkusz1
Group	Age	Sex	Education	Marital status	BMI	Professional activit	Chronic diseases	1 eating meals	2 moving from bed to chair and back	3 maintaining personal hygiene	4 using the toilet (toilet)	5 Washing and bathing the whole body	6 moving on flat surfaces	7 going up and down stairs	8 dressing and undressing	9 controlling stool/anal sphincter	10 controlling urine/bladder sphincter	Skala Barthel - total Exam 1	1 eating meals	2 moving from bed to chair and back	3 maintaining personal hygiene	4 using the toilet (toilet)	5 Washing and bathing the whole body	6 moving on flat surfaces	7 going up and down stairs	8 dressing and undressing	9 controlling stool/anal sphincter	10 kontrolowanie moczu/zwieracza pęcherza moczowego	Skala Barthel - total Exam 2	Tinetti - balance Exam 1	Tinetti - walk Exam 1	Tinetti - total Exam 1	Tinetti - balance Exam 2	Tinetti - walk Exam 2	Tinetti - total Exam 2	Time Up & Go Exam 1	Time Up & Go Exam 2
covid+stroke	68	1	2	2	26.079	2	1	5	5	5	5	5	5	5	5	10	10	60	10	10	10	10	5	5	5	10	10	10	85	8	4	12	13	9	22	12	8.5
covid+stroke	72	2	2	2	28.0816	2	2	0	5	0	0	0	5	0	5	0	0	15	5	5	5	0	10	5	0	10	10	10	60	6	6	11	13	8	15	13	9
covid+stroke	55	2	2	2	32.0312	2	1	0	0	0	0	0	0	0	0	5	5	10	0	0	0	0	5	0	0	5	5	5	20	0	0	0	5	1	2	15	8
covid+stroke	48	2	2	2	20.4491	1	1	10	10	10	5	5	5	5	10	10	10	80	10	10	10	10	10	10	10	10	10	10	100	11	10	19	14	10	19	12.5	9
covid+stroke	37	1	4	1	20.7008	1	2	5	5	10	5	0	5	0	5	10	10	55	10	10	10	10	10	10	5	10	10	10	95	9	3	6	13	8	15	14.5	9
covid+stroke	42	2	1	2	21.4533	1	2	5	10	10	5	5	5	5	5	10	10	70	10	10	10	5	5	10	5	10	10	10	85	3	1	2	11	6	12	14	8
covid+stroke	35	1	3	2	26.6728	2	1	5	5	5	5	0	5	5	5	10	10	55	10	10	10	10	5	10	5	10	10	10	90	7	7	14	13	9	17	12	8.5
covid+stroke	33	1	4	2	17.301	2	2	10	10	5	5	0	5	5	10	10	10	70	10	10	10	10	5	10	5	10	10	10	90	9	7	14	13	10	19	13.5	9
covid+stroke	71	1	2	1	26.079	2	1	5	5	5	5	0	0	0	5	10	10	45	5	5	5	5	5	5	5	5	10	10	60	0	0	0	1	0	0	13.5	8
covid+stroke	77	1	3	2	28.6689	2	1	5	0	5	0	0	0	0	5	5	5	25	5	0	5	5	5	5	5	5	5	5	45	0	0	0	6	3	6	14.5	9
covid+stroke	91	1	1	1	21.2084	2	1	5	5	5	0	0	5	0	0	5	5	30	0	0	0	0	0	0	0	0	0	0	0	3	5	9	5	2	4	15	8.5
covid+stroke	66	1	3	2	33.2031	2	1	5	5	10	5	0	5	5	5	10	10	60	10	10	10	10	5	10	5	10	10	10	90	6	5	10	11	6	11	14	8
covid+stroke	76	2	3	1	29.0612	2	2	5	5	10	5	0	5	0	5	10	10	55	10	10	10	5	5	10	5	10	10	10	85	8	2	4	11	6	12	14.5	8.5
covid+stroke	59	1	3	2	17.1468	2	1	5	5	10	5	5	5	5	10	10	10	70	10	10	10	5	5	10	5	10	10	10	85	4	2	4	13	7	13	12	9
covid+stroke	82	2	3	1	23.5102	2	1	10	5	5	5	0	5	0	5	10	10	55	10	5	5	5	5	5	0	5	10	10	60	4	2	4	11	6	12	12.5	8.5
covid+stroke	64	1	1	2	24.5578	2	2	5	0	0	0	5	0	0	0	0	0	10	5	5	5	0	0	0	0	5	10	10	40	0	0	0	4	0	0	13	9
covid+stroke	51	2	3	2	27.4406	2	2	5	10	5	5	5	0	0	5	5	5	45	5	10	5	5	5	10	0	5	10	10	65	9	7	14	11	7	14	15	9
covid+stroke	81	1	3	2	34.6746	2	1	5	5	5	5	5	0	0	5	5	5	40	5	5	5	5	0	5	0	5	5	5	40	8	5	9	8	8	15	13.5	9
stroke	70	1	2	1	19.9219	2	2	5	5	10	5	5	5	0	10	10	10	65	10	10	10	5	5	10	5	10	10	10	85	8	4	8	12	8	15	11.5	10
stroke	69	2	3	2	28.4005	2	1	10	5	10	5	5	0	0	10	10	10	65	10	10	10	5	5	5	0	10	10	10	75	8	4	8	11	8	15	12.5	10.5
stroke	71	2	4	2	23.7654	2	1	5	0	0	0	5	0	0	5	0	0	15	10	5	5	5	5	5	0	5	10	10	60	5	4	8	6	7	14	16	11
stroke	88	1	1	1	40.3902	2	1	5	0	0	0	0	0	0	0	0	0	5	5	0	0	0	0	0	0	0	0	0	5	0	0	0	1	0	0	11	10
stroke	70	1	3	2	27.9421	2	1	5	0	0	0	0	0	0	5	5	5	20	5	5	0	0	0	6	0	0	5	5	26	4	2	4	9	5	9	15.5	9
stroke	59	1	3	2	33.9624	1	2	5	5	10	5	5	5	0	10	10	10	65	10	10	10	10	5	10	0	10	10	10	85	13	8	15	15	9	17	11.5	8
stroke	68	2	2	2	32.526	2	1	5	5	0	0	5	0	0	5	10	10	40	10	10	5	5	5	5	0	5	10	10	65	7	1	2	12	8	15	16	10
stroke	65	2	4	2	38.6196	1	1	5	0	0	0	0	0	0	0	5	5	15	5	0	0	0	0	5	0	5	5	5	25	0	0	0	4	0	0	13.5	8.5
stroke	59	2	4	2	27.0416	1	1	5	5	5	5	5	5	5	5	5	5	50	5	5	5	5	0	5	0	5	5	5	40	2	1	1	9	2	4	15	12
stroke	53	2	3	2	30.5858	2	1	5	0	5	0	5	0	0	5	10	10	40	10	5	5	5	5	5	0	5	10	10	60	3	1	2	7	3	5	10.5	9
stroke	71	1	3	1	25.8645	2	1	10	5	5	0	5	0	0	5	10	10	50	10	5	5	5	5	5	0	5	10	10	60	1	0	0	5	1	2	11.5	8.5
stroke	77	1	3	2	33.5315	2	2	0	0	0	0	0	0	0	5	5	5	15	5	0	0	5	0	5	0	5	5	5	30	7	1	2	9	3	5	10	10
stroke	75	1	3	1	31.6346	2	1	5	5	5	5	0	0	0	5	10	10	45	5	5	5	5	0	5	0	5	10	10	50	6	2	4	7	5	9	13	10.5
stroke	71	1	3	1	20.7967	2	1	5	0	0	0	0	0	0	0	5	5	15	5	0	0	5	0	5	0	5	5	5	30	0	0	0	5	1	2	11	11
stroke	68	2	2	2	22.7244	2	2	5	5	10	10	5	5	5	10	10	10	75	10	10	10	10	10	10	10	10	10	10	100	11	10	19	13	10	19	12.5	10
stroke	74	2	3	2	22.7903	2	1	5	0	5	0	0	0	0	5	5	5	25	5	0	5	0	0	5	0	5	5	5	30	2	0	0	5	2	4	12	12
stroke	68	1	3	2	17.1468	2	1	10	5	10	5	0	5	0	10	10	10	65	10	10	10	5	10	10	5	10	10	10	90	10	5	9	12	9	17	13.5	9.5
stroke	79	2	2	2	30.7599	2	1	5	0	5	0	5	0	0	5	10	10	40	5	5	5	5	0	5	0	10	10	10	55	2	0	0	3	1	2	15.5	12
stroke	88	2	1	1	19.9432	2	2	0	0	0	0	5	0	0	0	0	0	5	5	5	0	0	0	5	0	0	0	0	15	0	0	0	0	0	0	13	9
stroke	55	2	4	2	21.4346	1	2	10	10	10	10	5	5	5	10	10	10	85	10	10	10	10	10	10	5	10	10	10	95	11	4	8	14	9	17	10.5	11
stroke	91	1	1	1	18.2222	2	1	5	5	5	5	0	5	0	0	5	5	35	5	5	5	5	0	10	0	5	5	5	45	5	0	0	5	0	0	12.5	12
stroke	69	1	4	2	19.1001	2	2	5	10	10	5	5	5	0	10	10	10	70	10	10	10	5	5	10	0	10	10	10	80	8	8	15	13	9	17	10.5	10.5
stroke	81	1	3	1	33.0579	2	1	5	0	5	0	5	5	0	5	5	5	35	5	5	5	5	5	5	0	5	5	5	45	2	0	0	2	0	0	15	9
stroke	72	2	3	2	23.7654	2	2	5	5	10	10	5	5	0	0	10	10	60	10	10	10	10	5	10	5	5	10	10	85	14	8	15	14	9	17	10	9.5
stroke	68	2	3	2	28.0864	2	1	5	10	10	0	0	0	0	10	10	10	55	10	10	10	5	5	10	0	10	10	10	80	10	0	0	13	6	12	12.5	12
stroke	58	2	4	2	27.7743	1	2	10	5	10	5	0	0	0	10	10	10	60	10	5	10	5	5	10	0	10	10	10	75	10	0	0	13	1	2	12	11.5
stroke	72	2	3	1	23.3234	2	1	10	0	5	0	0	0	0	5	10	10	40	10	5	5	5	0	5	0	5	10	10	55	10	0	0	12	4	7	15.5	11.5
stroke	80	2	2	2	24.0493	2	1	0	0	0	0	0	0	0	5	5	5	15	5	0	0	0	0	5	0	5	5	5	25	0	0	0	3	1	2	13	8
stroke	78	2	2	1	20.2449	2	1	5	0	5	0	0	0	0	5	5	5	25	5	5	5	5	0	5	0	5	5	5	40	1	0	0	5	1	2	15	9
stroke	63	1	3	2	24.7676	2	1	10	5	5	5	5	5	0	5	10	10	60	10	10	10	5	5	10	5	10	10	10	85	4	3	6	6	5	9	13.5	8.5
stroke	85	1	1	2	39.8437	2	1	0	0	0	0	0	0	0	0	0	0	0	5	0	0	0	0	0	8	0	5	5	23	0	0	0	0	0	0	15	11
stroke	65	1	2	2	23.5457	2	1	10	5	5	0	0	0	0	5	10	10	45	10	5	5	5	5	5	0	5	10	10	60	2	0	0	5	1	2	11	8
stroke	59	2	3	2	23.0825	1	2	5	5	5	5	0	5	5	5	10	10	55	10	5	5	5	0	5	0	10	10	10	60	11	8	15	13	9	17	12.5	8.5
stroke	90	1	1	1	19.736	2	1	5	0	0	0	0	0	0	5	10	10	30	5	5	0	5	0	5	0	5	10	10	45	0	0	0	0	0	0	12	12
stroke	71	2	3	2	26.6749	2	1	10	5	5	0	5	5	0	10	10	10	60	10	5	5	5	5	5	0	10	10	10	65	9	4	8	11	8	15	13	8.5
stroke	68	1	3	2	24.0346	2	1	10	5	5	5	5	5	0	5	10	10	60	10	5	5	5	5	5	0	5	10	10	60	9	6	12	12	9	17	16	11.5
stroke	80	1	2	1	37.1094	2	1	5	0	5	0	0	0	0	5	5	5	25	10	5	5	5	0	10	0	5	5	5	50	0	0	0	1	0	0	12.5	9.5
stroke	62	2	3	2	23.5457	1	2	10	5	5	5	0	5	0	5	10	10	55	10	5	5	5	5	10	0	5	10	10	65	9	6	12	9	7	13	14	10
stroke	77	1	2	2	25.8761	2	1	10	0	5	5	0	0	0	5	10	10	45	5	5	5	5	5	5	0	5	10	10	55	2	1	2	6	2	4	12	9.5
stroke	53	2	3	2	30.5858	1	1	10	0	10	0	0	0	0	5	10	10	45	10	5	10	5	5	10	0	5	10	10	70	9	4	8	9	6	11	15.5	11.5
stroke	59	2	4	2	31.8773	1	1	10	5	5	5	0	5	0	10	10	10	60	10	5	5	5	5	10	0	10	10	10	70	9	4	8	9	4	8	12	9
stroke	36	1	3	2	21.9671	1	2	10	5	5	0	0	0	0	5	10	10	45	10	5	5	5	5	5	0	5	10	10	60	9	4	8	14	10	19	14.5	11
